# Supplementary material for: Severity of Respiratory Syncytial Virus vs COVID-19 and Influenza Among Hospitalized US Adults
Source: PubMed Central journal article supplement (PMC11192181; doi:10.1001/jamanetworkopen.2024.4954), 2024-04-04
Supplement: jamanetwopen-e244954-s004.pdf [file jamanetwopen-e244954-s004.pdf]

## Data Sharing Statement

Surie. Severity of Respiratory Syncytial Virus vs COVID-19 and Influenza Among Hospitalized US Adults. *JAMA Netw Open*. Published April 04, 2024.  
doi:10.1001/jamanetworkopen.2024.4954

### Data

**Data available:** No
